# Supplementary material for: Cost-Effectiveness of SGLT2is Versus DPP4is Among Type 2 Diabetes Patients with and Without Established Cardiovascular Disease: A Model-Based Simulation Analysis Using 10-Year Real-World Data and Systematic Review
Source: Research Square preprint supplement (doi:10.21203/rs.3.rs-1126975/v1), 2021-12-02
Supplement: Supplementary file 1 [file 08023be97f3995d8cc786279.pdf]

## Additional file 7. Search strategies for cost-effectiveness of SGLT2is versus DPP4is

We searched for articles with available full text published in English from PubMed and Embase from the inception of each database to July 2, 2021, that reported a cost-effectiveness analysis of sodium-glucose cotransporter-2 inhibitors (SGLT2is) versus dipeptidyl peptidase 4 inhibitors (DPP4is). The search strategies, which used the framework Patient Intervention Comparison Outcome (PICO), and keywords are listed in the following table. 14 and 12 articles were identified from PubMed and Embase, respectively.

Search strategies for literature review in framework Patient Intervention Comparison Outcome (PICO)

| #                   | Keywords                                 |
|---------------------|------------------------------------------|
| <b>Patient</b>      |                                          |
| 1                   | Type 2 diabetes                          |
| <b>Intervention</b> |                                          |
| 2                   | Sodium glucose cotransporter 2 inhibitor |
| 3                   | SGLT2 inhibitor                          |
| 4                   | SGLT2i                                   |
| 5                   | Empagliflozin                            |
| 6                   | Dapagliflozin                            |
| 7                   | Canagliflozin                            |
| 8                   | Ertugliflozin                            |
| 9                   | Ipragliflozin                            |
| 10                  | Luseogliflozin                           |
| 11                  | Remogliflozin                            |
| 12                  | Sergliflozin                             |
| 13                  | Sotagliflozin                            |
| 14                  | Tofogliflozin                            |
| <b>Comparison</b>   |                                          |
| 15                  | Dipeptidyl peptidase 4 inhibitor         |
| 16                  | DPP4 inhibitor                           |
| 17                  | DPP4i                                    |
| 18                  | Sitagliptin                              |
| 19                  | Saxagliptin                              |
| 20                  | Vildagliptin                             |
| 21                  | Linagliptin                              |
| 22                  | Alogliptin                               |
| 23                  | Gemigliptin                              |

- 24 Anagliptin
- 25 Teneligliptin
- 26 Trelagliptin
- 27 Omarigliptin
- 28 Evogliptin
- 29 Gosogliptin

**Outcome**

- 30 Cost-effectiveness
- 31 Economic
- 32 Cost-utility

**Search strategy:** 1 AND (2 OR 3 OR 4 OR 5 OR 6 OR 7 OR 8 OR 9 OR 10 OR 11 OR 12 OR 13 OR 14) AND (15 OR 16 OR 17 OR 18 OR 19 OR 20 OR 21 OR 22 OR 23 OR 24 OR 25 OR 26 OR 27 OR 28 OR 29) AND (30 OR 31 OR 32)

---
