# Supplementary material for: Cost-Effectiveness of SGLT2is Versus DPP4is Among Type 2 Diabetes Patients with and Without Established Cardiovascular Disease: A Model-Based Simulation Analysis Using 10-Year Real-World Data and Systematic Review
Source: Research Square preprint supplement (doi:10.21203/rs.3.rs-1126975/v1), 2021-12-02
Supplement: Supplementary file 2 [file 253e49a99e61d7c403254752.pdf]

Additional file 10. Details of present and existing studies included in systematic review

| Study (country, perspective)                 | Model     | Study population           | Data source of effectiveness | Time horizon, discount rate | Treatment                   | ICER in 2020 USD* (CE or CS) | Methodological issues:                      |                                                                      |                                                     |                                                               |
|----------------------------------------------|-----------|----------------------------|------------------------------|-----------------------------|-----------------------------|------------------------------|---------------------------------------------|----------------------------------------------------------------------|-----------------------------------------------------|---------------------------------------------------------------|
|                                              |           |                            |                              |                             |                             |                              | (1) Generalizability to real-world practice | (2) Representativeness of effectiveness inputs to target populations | (3) Use of country-/population-specific cost inputs | (4) Use of country-/population-specific health utility inputs |
|                                              |           |                            |                              |                             |                             |                              | (1)                                         | (2)                                                                  | (3)                                                 | (4)                                                           |
| Charokopou, 2015 (UK, third-party payer)     | Cardiff   | T2D patients aged 57 years | NMA of clinical trials       | Lifetime, 3.5%              | Dapagliflozin versus DPP4is | USD 10,269.16 (CE)           | Limited <sup>†</sup>                        | Yes                                                                  | Yes                                                 | Yes                                                           |
| Neslusan, 2015 (Mexico, third-party payer)   | ECHO-T2DM | T2D patients aged 55 years | 4-arm clinical trial         | 20 years, 5.0%              | Canagliflozin versus DPP4is | USD 715.94 to 8,231.27 (CE)  | Limited <sup>†</sup>                        | Yes                                                                  | Yes                                                 | No                                                            |
| Sabapathy, 2016 (Canada, third-party payer)  | ECHO-T2DM | T2D patients aged 56 years | Clinical trials              | 40 years, 5.0%              | Canagliflozin versus DPP4is | Canagliflozin dominates (CS) | Limited <sup>†</sup>                        | Yes                                                                  | Yes                                                 | Yes                                                           |
| Tzanetakos, 2016 (Greece, third-party payer) | Cardiff   | T2D patients aged 57 years | NMA of clinical trials       | Lifetime, 3.5%              | Dapagliflozin versus DPP4is | USD 21,230.92 (CE)           | Limited <sup>†</sup>                        | Limited <sup>‡</sup>                                                 | Yes                                                 | No                                                            |

|                                             |                                              |                            |                                                                                                     |                                                   |                                                 |                               |                      |                      |     |     |
|---------------------------------------------|----------------------------------------------|----------------------------|-----------------------------------------------------------------------------------------------------|---------------------------------------------------|-------------------------------------------------|-------------------------------|----------------------|----------------------|-----|-----|
| Chakravarty, 2018 (US, third-party payer)   | SDAM                                         | T2D patients aged 57 years | NMA of clinical trials                                                                              | 1 year, N/A                                       | Dapagliflozin versus DPP4is                     | Dapagliflozin dominates (CS)  | Limited <sup>†</sup> | Yes                  | Yes | No  |
| Ramos, 2019 (UK, third-party payer)         | CORE                                         | T2D patients aged 63 years | CVOTs                                                                                               | 50 years, 3.5%                                    | Empagliflozin versus sitagliptin or saxagliptin | USD 5,194.49 to 8,658.38 (CE) | Limited <sup>†</sup> | Yes                  | Yes | Yes |
| Reifsnider, 2021 (US, third-party payer)    | UKPDS-OM 1 and 2 and EMPA-REG risk equations | T2D patients aged 61 years | NMA of clinical trials (for patients without CVD history) and CVOTs (for patients with CVD history) | Lifetime, 3.0%                                    | Empagliflozin versus sitagliptin                | USD 7,177.25 (CE)             | Limited <sup>†</sup> | Yes                  | Yes | Yes |
| Hu, 2021 (China, third-party payer)         | UKPDS-OM 2                                   | T2D patients aged 55 years | Clinical trials                                                                                     | Lifetime, 5.0%                                    | Dapagliflozin versus saxagliptin                | USD 12,342.39 (CE)            | Limited <sup>†</sup> | Limited <sup>§</sup> | Yes | Yes |
| Van der Linden, 2021 (Netherland, societal) | Cardiff                                      | T2D patients aged 61 years | Clinical trials                                                                                     | 40 years, 4% for costs and 1.5% for effectiveness | Dapagliflozin versus DPP4is                     | Dapagliflozin dominates (CS)  | Limited <sup>†</sup> | Yes                  | Yes | No  |
| Present study                               | Markov                                       | T2D patients aged          | Observational                                                                                       | 10 years,                                         | SGLT2is                                         | USD                           | Yes                  | Yes                  | Yes | Yes |

(Taiwan, model 55 years study 3.0% versus DPP4is 3,244.07 to healthcare 4,185.64 (CE) sectors)

---

Abbreviations: ICER, incremental cost effectiveness ratio; USD, United States dollar; CE, cost-effective; CS, cost-saving; T2D, type 2 diabetes; NMA, network meta-analysis; DPP4is, dipeptidyl peptidase 4 inhibitors; ECHO-T2DM, economic and health outcomes model of type 2 diabetes mellitus; SDAM, short-term decision-analytic model; N/A, not applicable; CORE, CORE diabetes model; CVOTs, cardiovascular outcomes trials; UKPDS-OM1, United Kingdom Prospective Diabetes Study Outcomes Model version 1; UKPDS-OM2, United Kingdom Prospective Diabetes Study Outcomes Model version 2; EMPA-REG, Empagliflozin, Cardiovascular Outcomes, and Mortality in Type 2 Diabetes; CVD, cardiovascular disease; SGLT2is, sodium-glucose cotransporter-2 inhibitors.

\*The original estimates of ICERs were extracted from the published article and inflated to 2020 using the country-specific consumer price index; they are presented as USD per QALY gained in this summary table.

†Due to the effectiveness parameters that were obtained from clinical trials, the generalizability of results of previous cost-effectiveness analyses to real-world settings is limited.

‡The effectiveness parameters were from a clinical trial without Greek patients.

§The effectiveness parameters were synthesized from 5 clinical trials; Asian participants accounted for only 0.4%-6% of the population in these trials.
