# Supplementary material for: Cost-Effectiveness of SGLT2is Versus DPP4is Among Type 2 Diabetes Patients with and Without Established Cardiovascular Disease: A Model-Based Simulation Analysis Using 10-Year Real-World Data and Systematic Review
Source: Research Square preprint supplement (doi:10.21203/rs.3.rs-1126975/v1), 2021-12-02
Supplement: Supplementary file 3 [file 392763eaacf75a141578eecc.pdf]

Additional file 9. Impact of SGLT2i's drug acquisition cost change on incremental cost-effectiveness ratios in type 2 diabetes patients with and without cardiovascular disease history

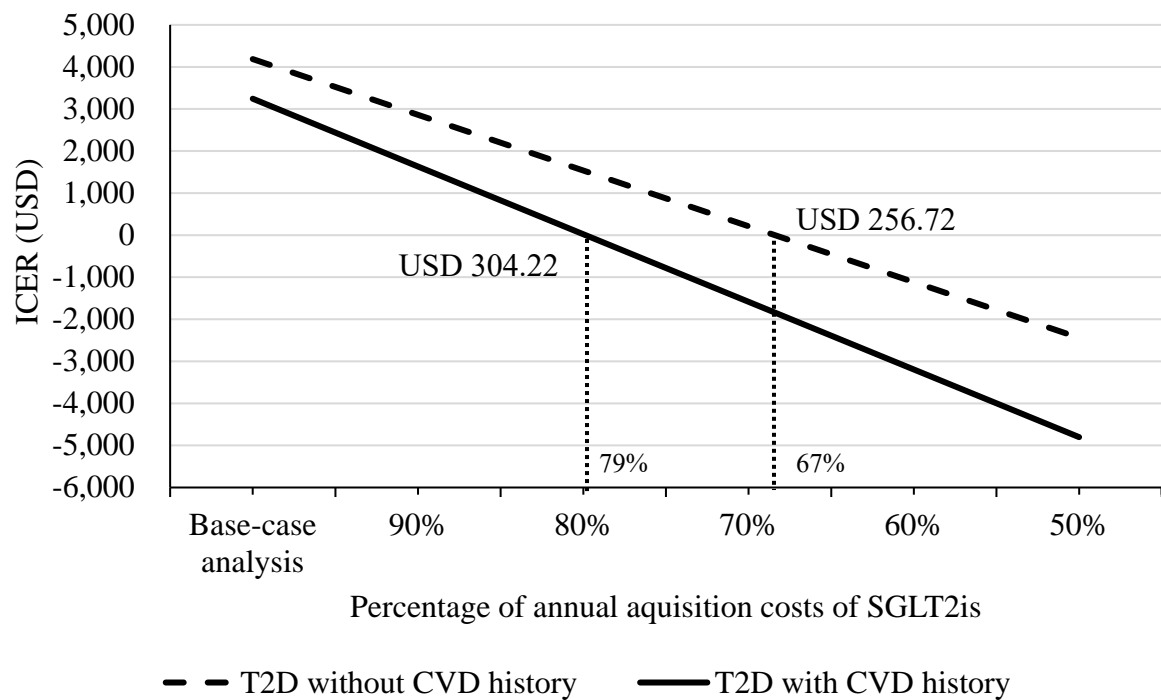

Abbreviations: ICER: incremental cost-effectiveness ratio, SGLT2is: sodium-glucose cotransporter-2 inhibitors; T2D: type 2 diabetes; CVD: cardiovascular disease.
