# Supplementary material for: Cost-Effectiveness of SGLT2is Versus DPP4is Among Type 2 Diabetes Patients with and Without Established Cardiovascular Disease: A Model-Based Simulation Analysis Using 10-Year Real-World Data and Systematic Review
Source: Research Square preprint supplement (doi:10.21203/rs.3.rs-1126975/v1), 2021-12-02
Supplement: Supplementary file 4 [file 44204a27589d6bf0afb2eb46.pdf]

Additional file 4. Relative hazards of presence versus absence of cardiovascular diseases on risk of all-cause death in type 2 diabetes patients

| CVDs                                                                                            | Hazard ratio (95% CI) | PSA distribution | Reference           |
|-------------------------------------------------------------------------------------------------|-----------------------|------------------|---------------------|
| <b>Effects of CVD history on all-cause mortality among patients with CVD history</b>            |                       |                  |                     |
| Composite CVDs                                                                                  | 1.24 (1.18-1.29)      | Normal           |                     |
| <b>Effects of CVD events on all-cause mortality among patients with and without CVD history</b> |                       |                  | PLoS Med.           |
| HF                                                                                              | 2.21(2.05-2.38)       | Normal           | 2020;17(5):e1003094 |
| MI                                                                                              | 1.24 (1.18-1.29)      | Normal           |                     |
| Stroke                                                                                          | 1.69 (1.60-1.77)      | Normal           |                     |

Abbreviations: CVDs, cardiovascular diseases; CI, confidence interval; PSA, probabilistic sensitivity analysis; HF, heart failure; MI, myocardial infarction.

Note: The hazard ratios (95% CIs) of co-existing CVDs on all-cause death risk were 2.36 (2.14-2.61) and 2.51 (2.16-2.92) for HF with MI and HF with stroke, respectively.
