# Supplementary material for: Cost-Effectiveness of SGLT2is Versus DPP4is Among Type 2 Diabetes Patients with and Without Established Cardiovascular Disease: A Model-Based Simulation Analysis Using 10-Year Real-World Data and Systematic Review
Source: Research Square preprint supplement (doi:10.21203/rs.3.rs-1126975/v1), 2021-12-02
Supplement: Supplementary file 5 [file 583f133c56516b108061cec1.pdf]

Additional file 11. Summary of existing cost-effectiveness studies of SGLT2is versus DPP4is in type 2 diabetes treatment

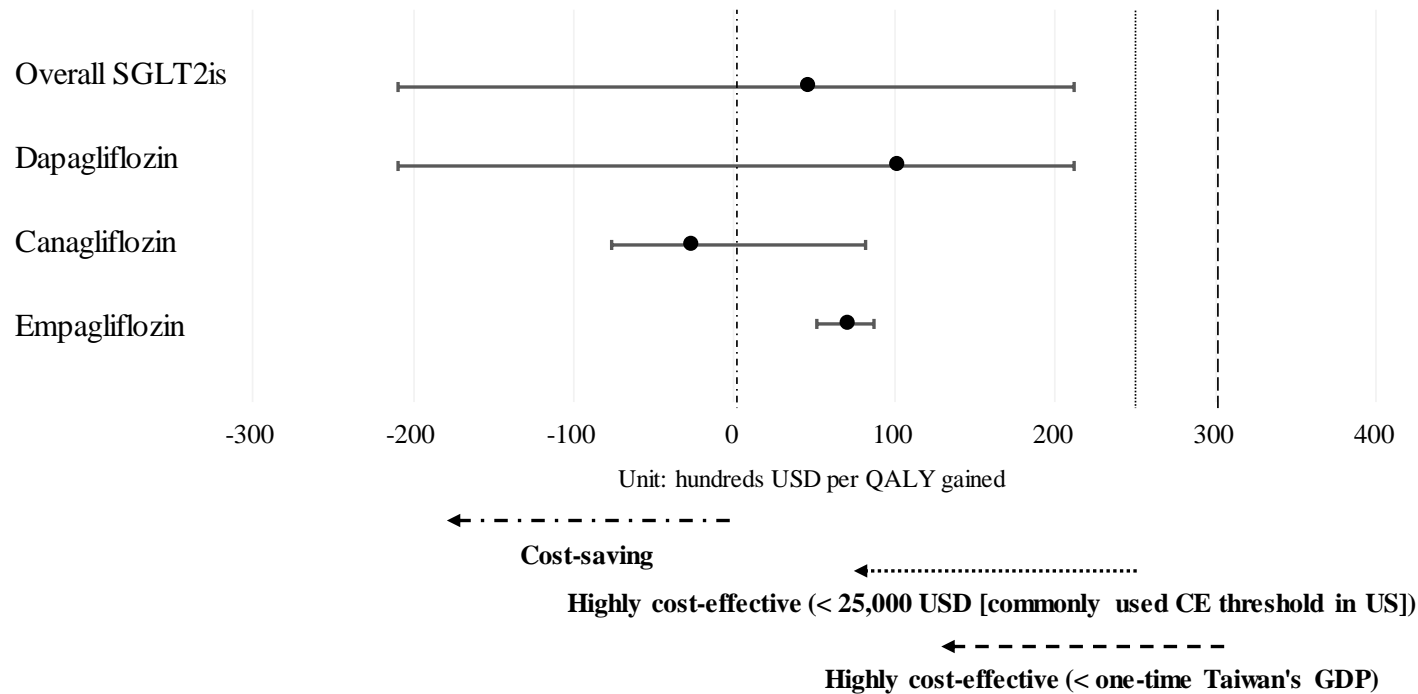

Abbreviations: SGLT2is, sodium-glucose cotransporter-2 inhibitors; DPP4is, dipeptidyl peptidase 4 inhibitors; USD, United States dollar; QALY, quality-adjusted life-year; CE, cost-effective; US, United States; GDP, Gross Domestic Product.

Note:

1. Black circles refer to the median value of base-case ICERs extracted from existing studies (including the present study).
2. One-time Taiwan's per capita GDP in 2020 (i.e., USD 30,038) and commonly used cost-effective threshold in US in 2020 (i.e., USD 25,000) are provided to determine whether a SGLT2i is a highly cost-effective treatment choice.
