# Supplementary material for: Cost-Effectiveness of SGLT2is Versus DPP4is Among Type 2 Diabetes Patients with and Without Established Cardiovascular Disease: A Model-Based Simulation Analysis Using 10-Year Real-World Data and Systematic Review
Source: Research Square preprint supplement (doi:10.21203/rs.3.rs-1126975/v1), 2021-12-02
Supplement: Supplementary file 6 [file b28cc6b664df96224cf927df.pdf]

Additional file 2. Analytical procedures and resources for estimation of transition probabilities among type 2 diabetes patients with and without cardiovascular disease history

| Pathway between health states                                 | Estimation for transition probabilities                                                                                                                                                                                                                                                                                                                                                                                                                                                                                                                                                                                                                                                                                                                                                                                                                                                                                                                                                                                                                                                                                                                                                                                                                                                                                                                                                                                                                                                        | Reference                              |
|---------------------------------------------------------------|------------------------------------------------------------------------------------------------------------------------------------------------------------------------------------------------------------------------------------------------------------------------------------------------------------------------------------------------------------------------------------------------------------------------------------------------------------------------------------------------------------------------------------------------------------------------------------------------------------------------------------------------------------------------------------------------------------------------------------------------------------------------------------------------------------------------------------------------------------------------------------------------------------------------------------------------------------------------------------------------------------------------------------------------------------------------------------------------------------------------------------------------------------------------------------------------------------------------------------------------------------------------------------------------------------------------------------------------------------------------------------------------------------------------------------------------------------------------------------------------|----------------------------------------|
| <b>T2D patients with CVD history</b>                          |                                                                                                                                                                                                                                                                                                                                                                                                                                                                                                                                                                                                                                                                                                                                                                                                                                                                                                                                                                                                                                                                                                                                                                                                                                                                                                                                                                                                                                                                                                |                                        |
| (a) Transition from T2D without CVD events to HF              | <ul style="list-style-type: none"> <li>Number of HF events that occurred in each year (from 2010 to 2018) divided by number of DPP4i users</li> </ul>                                                                                                                                                                                                                                                                                                                                                                                                                                                                                                                                                                                                                                                                                                                                                                                                                                                                                                                                                                                                                                                                                                                                                                                                                                                                                                                                          | NHIRD                                  |
| (b) Transition from T2D without CVD events to MI              | <ul style="list-style-type: none"> <li>Number of MI events that occurred in each year (from 2010 to 2018) divided by number of DPP4i users</li> </ul>                                                                                                                                                                                                                                                                                                                                                                                                                                                                                                                                                                                                                                                                                                                                                                                                                                                                                                                                                                                                                                                                                                                                                                                                                                                                                                                                          | NHIRD                                  |
| (c) Transition from T2D without CVD events to stroke          | <ul style="list-style-type: none"> <li>Number of stroke events that occurred in each year (from 2010 to 2018) divided by number of DPP4i users</li> </ul>                                                                                                                                                                                                                                                                                                                                                                                                                                                                                                                                                                                                                                                                                                                                                                                                                                                                                                                                                                                                                                                                                                                                                                                                                                                                                                                                      | NHIRD                                  |
| (d) Transition from T2D without CVD events to all-cause death | <ul style="list-style-type: none"> <li>First, a 22-point risk score system that contained risk factors with 0 to 5 points (indicating no to high impact on mortality) was applied. The risk factors and associated points for prediction of 3-, 5-, and 10-year cumulative all-cause mortalities of Taiwanese T2D patients in the base-case analysis of this study were age of 55 years (contributed 3 points), diabetes duration of 8 years (contributed 1 point), use of glucose-lowering agents (1 point), and other risk factors, which were set to average values (i.e., with education <math>\geq 13</math> years, without smoking behavior and history of peripheral neuropathy, body mass index in range of 25.0-29.9 kg/m<sup>2</sup>, variation of fasting plasma glucose <math>&lt; 22.3\%</math>, variation of glycated hemoglobin <math>&lt; 4.5\%</math>, variation of diastolic blood pressure <math>&lt; 5.5\%</math>, triglycerides <math>&lt; 150</math> mg/dL) (contributed 0 points).</li> <li>Second, to fit the yearly model cycle, the risks of 3-, 5-, and 10-year cumulative all-cause mortalities were converted into the mortality for each year using the following equation: cumulative mortality = <math>1 - e^{(-\text{mortality rate} \times \text{time})}</math>. The remaining mortalities in the 1<sup>st</sup>, 2<sup>nd</sup>, 4<sup>th</sup>, 6<sup>th</sup>, 7<sup>th</sup>, 8<sup>th</sup>, and 9<sup>th</sup> years were imputed using the</li> </ul> | Liu <sup>1</sup> ; Chiang <sup>2</sup> |

(e) Transition from T2D without CVD events to cardiovascular death

interpolation function in TreeAge software. The mortality estimates for patients without CVD history were obtained from these two steps.

- Third, to obtain the mortality for each year cycle for patients with CVD history, the mortality estimate for each year for patients without CVD history was multiplied by a factor of 1.24, which reflects the impact of having established CVDs on a patient's mortality.
- First, a 22-point risk score system that contained risk factors with 0 to 5 points (indicating no to high impact on mortality) was applied. The risk factors and associated points for prediction of 3-, 5-, and 10-year cumulative cardiovascular mortalities of Taiwanese T2D patients in the base-case analysis of this study were age of 55 years (contributed 3 points), diabetes duration of 8 years (contributed 2 point), use of glucose-lowering agents (1 point), and other risk factors, which were set to average values (i.e., with education  $\geq 13$  years, without smoking behavior and history of peripheral neuropathy, body mass index in range of 25.0-29.9 kg/m<sup>2</sup>, variation of fasting plasma glucose < 22.3%, variation of glycated hemoglobin < 4.5%, variation of systolic blood pressure < 9.0%, triglycerides < 150 mg/dL) (contributed 0 points).
- Second, to fit the yearly model cycle, the risks of 3-, 5-, and 10-year cumulative cardiovascular mortalities were converted into the mortality for each year using the following equation: cumulative mortality =  $1 - e^{-(\text{mortality rate} \times \text{time})}$ . The remaining mortalities in the 1<sup>st</sup>, 2<sup>nd</sup>, 4<sup>th</sup>, 6<sup>th</sup>, 7<sup>th</sup>, 8<sup>th</sup>, and 9<sup>th</sup> years were imputed using the interpolation function in TreeAge software. The mortality estimates for patients without CVD history were obtained from these two steps.
- Third, to obtain the mortality for each year cycle for patients with CVD history, the mortality estimate for each year for patients without CVD history was

Liu<sup>1</sup>; Chiang<sup>2</sup>

multiplied by a factor of 1.24, which reflects the impact of having established CVDs on a patient's mortality.

|                                     |                                                                                                                                                                                              |                                        |
|-------------------------------------|----------------------------------------------------------------------------------------------------------------------------------------------------------------------------------------------|----------------------------------------|
| (f) Transition from HF to MI        | • Number of subsequent MI events that occurred after HF in each year (from 2010 to 2018) divided by number of patients with HF                                                               | NHIRD                                  |
| (g) Transition from HF to stroke    | • Number of subsequent stroke events that occurred after HF in each year (from 2010 to 2018) divided by number of patients with HF                                                           | NHIRD                                  |
| (h) Transition from MI to HF        | • Number of subsequent HF events that occurred after MI in each year (from 2010 to 2018) divided by number of patients with MI                                                               | NHIRD                                  |
| (i) Transition from stroke to HF    | • Number of subsequent HF events that occurred after stroke in each year (from 2010 to 2018) divided by number of patients with stroke                                                       | NHIRD                                  |
| (j) Transition from HF to death     | • To obtain the mortality for each year after HF occurrence, the transition probability (d) was multiplied by a factor 2.21, which reflects the impact of HF occurrence on mortality         | Liu <sup>1</sup> ; Chiang <sup>2</sup> |
| (k) Transition from MI to death     | • To obtain the mortality for each year after MI occurrence, the transition probability (d) was multiplied by a factor 1.24, which reflects the impact of MI occurrence on mortality         | Liu <sup>1</sup> ; Chiang <sup>2</sup> |
| (l) Transition from stroke to death | • To obtain the mortality for each year after stroke occurrence, the transition probability (d) was multiplied by a factor 1.69, which reflects the impact of stroke occurrence on mortality | Liu <sup>1</sup> ; Chiang <sup>2</sup> |

**T2D patients without CVD history**

|                                                  |                                                                                                       |       |
|--------------------------------------------------|-------------------------------------------------------------------------------------------------------|-------|
| (a) Transition from T2D without CVD events to HF | • Number of HF events that occurred in each year (from 2010 to 2018) divided by number of DPP4i users | NHIRD |
| (b) Transition from T2D without CVD events to MI | • Number of MI events that occurred in each year (from 2010 to 2018) divided by number of DPP4i users | NHIRD |
| (c) Transition from T2D without                  | • Number of stroke events that occurred in each year (from 2010 to 2018) divided                      | NHIRD |

CVD events to stroke

(d) Transition from T2D without CVD events to all-cause death

by number of DPP4i users

- First, a 22-point risk score system that contained risk factors with 0 to 5 points (indicating no to high impact on mortality) was applied. The risk factors and associated points for prediction of 3-, 5-, and 10-year cumulative all-cause mortalities of Taiwanese T2D patients in the base-case analysis of this study were age of 55 years old (contributed 3 points), diabetes duration of 8 years (contributed 1 point), use of glucose-lowering agents (1 point), and other risk factors, which were set to average values (i.e., with education  $\geq 13$  years, without smoking behavior and history of peripheral neuropathy, body mass index in range of 25.0-29.9 kg/m<sup>2</sup>, variation of fasting plasma glucose  $< 22.3\%$ , variation of glycated hemoglobin  $< 4.5\%$ , variation of diastolic blood pressure  $< 5.5\%$ , triglycerides  $< 150$  mg/dL) (contributed 0 points).
- Second, to fit the yearly model cycle, the risks of 3-, 5-, and 10-year cumulative all-cause mortalities were converted into the mortality for each year using the following equation: cumulative mortality =  $1 - e^{-(\text{mortality rate} \times \text{time})}$ . The remaining mortalities in the 1<sup>st</sup>, 2<sup>nd</sup>, 4<sup>th</sup>, 6<sup>th</sup>, 7<sup>th</sup>, 8<sup>th</sup>, and 9<sup>th</sup> years were imputed using interpolation function in TreeAge software.

Liu<sup>1</sup>

(e) Transition from T2D without CVD events to cardiovascular death

- First, a 22-point risk score system that contained risk factors with 0 to 5 points (indicating no to high impact on mortality) was applied. The risk factors and associated points for prediction of 3-, 5-, and 10-year cumulative cardiovascular mortalities of Taiwanese T2D patients in the base-case analysis of this study were age of 55 years old (contributed 3 points), diabetes duration of 8 years (contributed 2 point), use of glucose-lowering agents (1 point), and other risk factors, which were set to average values (i.e., with education  $\geq 13$  years, without smoking behavior and history of peripheral neuropathy, body mass index

Liu<sup>1</sup>

in range of 25.0-29.9 kg/m<sup>2</sup>, variation of fasting plasma glucose < 22.3%, variation of glycated hemoglobin < 4.5%, variation of systolic blood pressure < 9.0%, triglycerides < 150 mg/dL) (contributed 0 points).

- Second, to fit the yearly model cycle, the risks of 3-, 5-, and 10-year cumulative cardiovascular mortalities were converted into the mortality for each year using the following equation: cumulative mortality =  $1 - e^{(-\text{mortality rate} \times \text{time})}$ . The remaining mortalities in the 1<sup>st</sup>, 2<sup>nd</sup>, 4<sup>th</sup>, 6<sup>th</sup>, 7<sup>th</sup>, 8<sup>th</sup>, and 9<sup>th</sup> years were imputed using the interpolation function in TreeAge software. The mortality estimates for patients without CVD history were obtained from these two steps.

|                                     |                                                                                                                                                                                                                                        |                                        |
|-------------------------------------|----------------------------------------------------------------------------------------------------------------------------------------------------------------------------------------------------------------------------------------|----------------------------------------|
| (f) Transition from HF to MI        | <ul style="list-style-type: none"> <li>• Number of subsequent MI events that occurred after HF in each year (from 2010 to 2018) divided by number of patients with HF</li> </ul>                                                       | NHIRD                                  |
| (g) Transition from HF to stroke    | <ul style="list-style-type: none"> <li>• Number of subsequent stroke events that occurred after HF in each year (from 2010 to 2018) divided by number of patients with HF</li> </ul>                                                   | NHIRD                                  |
| (h) Transition from MI to HF        | <ul style="list-style-type: none"> <li>• Number of subsequent HF events that occurred after MI in each year (from 2010 to 2018) divided by number of patients with MI</li> </ul>                                                       | NHIRD                                  |
| (i) Transition from stroke to HF    | <ul style="list-style-type: none"> <li>• Number of subsequent HF events that occurred after stroke in each year (from 2010 to 2018) divided by number of patients with stroke</li> </ul>                                               | NHIRD                                  |
| (j) Transition from HF to death     | <ul style="list-style-type: none"> <li>• To obtain the mortality for each year after HF occurrence, the transition probability (d) was multiplied by a factor 2.21, which reflects the impact of HF occurrence on mortality</li> </ul> | Liu <sup>1</sup> ; Chiang <sup>2</sup> |
| (k) Transition from MI to death     | <ul style="list-style-type: none"> <li>• To obtain the mortality for each year after MI occurrence, the transition probability (d) was multiplied by a factor 1.24, which reflects the impact of MI occurrence on mortality</li> </ul> | Liu <sup>1</sup> ; Chiang <sup>2</sup> |
| (l) Transition from stroke to death | <ul style="list-style-type: none"> <li>• To obtain the mortality for each year after stroke occurrence, the transition probability (d) was multiplied by a factor 1.69, which reflects the impact of</li> </ul>                        | Liu <sup>1</sup> ; Chiang <sup>2</sup> |

---

Abbreviations: T2D, type 2 diabetes; CVD, cardiovascular disease; HF, heart failure; DPP4i, dipeptidyl peptidase 4 inhibitors; NHIRD, National Health Insurance Research Database; MI, myocardial infarction.

References:

1. Diabetes Obes Metab. 2021;23(2):467-479.
2. PLoS Med. 2020;17(5):e1003094.
