# Supplementary material for: Cost-Effectiveness of SGLT2is Versus DPP4is Among Type 2 Diabetes Patients with and Without Established Cardiovascular Disease: A Model-Based Simulation Analysis Using 10-Year Real-World Data and Systematic Review
Source: Research Square preprint supplement (doi:10.21203/rs.3.rs-1126975/v1), 2021-12-02
Supplement: Supplementary file 8 [file d0211cfaa1b23d12fb8ba1a5.pdf]

Additional file 5. Health utility and cost parameters for type 2 diabetes patients with and without cardiovascular disease history

| Description                                                                                                                                                               | Base value (range)<br>[PSA distribution] | Reference         |
|---------------------------------------------------------------------------------------------------------------------------------------------------------------------------|------------------------------------------|-------------------|
| <b>Baseline health utility values of T2D patients with and without CVD history in state of no event: 0.798 (0.782-0.814) and 0.983 (0.967-0.999), respectively*</b>       |                                          |                   |
| <b>Utility penalties</b>                                                                                                                                                  |                                          |                   |
| Stroke                                                                                                                                                                    | 0.266 (0.186-0.346) [Normal]             | Kuo <sup>1</sup>  |
| Myocardial infarction                                                                                                                                                     | 0.185 (0.036-0.334) [Normal]             |                   |
| Heart failure                                                                                                                                                             | 0.237 (0.178-0.296) [Normal]             |                   |
| Age (per year greater; centered at 62)                                                                                                                                    | 0.002 (N/A)                              |                   |
| <b>Baseline annual healthcare costs for T2D patients with and without CVD history under routinely care of T2D: USD 624 (619-628) and USD 529 (525-532), respectively*</b> |                                          |                   |
| <b>Cost multipliers</b>                                                                                                                                                   |                                          |                   |
| Stroke (event-year)                                                                                                                                                       | 2.95 (2.92-2.98) [Normal]                | Chen <sup>2</sup> |
| Stroke (state-year)                                                                                                                                                       | 1.44 (1.43-1.45) [Normal]                |                   |
| Myocardial infarction (event-year)                                                                                                                                        | 2.53 (2.48-2.58) [Normal]                |                   |
| Myocardial infarction (state-year)                                                                                                                                        | 1.18 (1.16-1.20) [Normal]                |                   |
| Heart failure (event-year)                                                                                                                                                | 2.24 (2.21-2.27) [Normal]                |                   |
| Heart failure (state-year)                                                                                                                                                | 1.49 (1.47-1.52) [Normal]                |                   |
| Cardiovascular death                                                                                                                                                      | 20.49 (19.93-21.05) [Normal]             |                   |
| Non-cardiovascular death                                                                                                                                                  | 16.42 (16.20-16.64) [Normal]             |                   |
| <b>Annual drug acquisition costs</b>                                                                                                                                      |                                          |                   |
| SGLT2is                                                                                                                                                                   | 384 (373-395) [Triangular]               | NHI <sup>3</sup>  |
| DPP4is                                                                                                                                                                    | 214 (87-319) [Triangular]                |                   |

Abbreviations: T2D: type 2 diabetes; CVD: cardiovascular disease; PSA, probabilistic

sensitivity analysis; N/A, not available; SGLT2is, sodium-glucose cotransporter-2 inhibitors; DPP4is, dipeptidyl peptidase 4 inhibitors; NHI, National Health Insurance.

\*The baseline health utility and cost parameters for base-case patients in this study were estimated based on our assumptions of patient baseline characteristics (i.e., age of 55 years, diabetes duration of 8 years, exposure to oral antidiabetic agents [SGLT2is or DPP4is]) and stratified by the presence of CVD history. For example, the baseline health utility and cost parameters for T2D patients with CVD history were 0.798 (i.e., 0.983 [baseline health utility for T2D without CVD history] – 0.185 [utility penalty due to the presence of CVD history]) and USD 624 (i.e., USD 349.63 [baseline costs for T2D patients aged 55 years] × 0.85 [cost multiplier for diabetes duration of 8 years] × 1.78 [cost multiplier for initiating DPP4i or SGLT2i] × 1.18 [cost multiplier for having CVD history]), respectively.

#### References:

1. J Diabetes Investig. 2021 Sep;12(9):1749-1758.
2. Diabetes Care 2020;43(8):1732-1740.
3. List of reimbursed drugs by NHI. Available from <https://www.nhi.gov.tw/QueryN/Query1.aspx> on July 04, 2021.
