# Supplementary material for: Cost-Effectiveness of SGLT2is Versus DPP4is Among Type 2 Diabetes Patients with and Without Established Cardiovascular Disease: A Model-Based Simulation Analysis Using 10-Year Real-World Data and Systematic Review
Source: Research Square preprint supplement (doi:10.21203/rs.3.rs-1126975/v1), 2021-12-02
Supplement: Supplementary file 9 [file ef6ce847b2cb6f776531b447.pdf]

Additional file 6. Impact inventory for components in cost-effectiveness analysis

| Type of impact                                       | Included in this reference case analysis from each perspective |          | Notes on source of evidence                                                                  |
|------------------------------------------------------|----------------------------------------------------------------|----------|----------------------------------------------------------------------------------------------|
|                                                      | Healthcare sector                                              | Societal |                                                                                              |
| Formal healthcare sector                             |                                                                |          |                                                                                              |
| Health                                               |                                                                |          |                                                                                              |
| Health outcomes                                      |                                                                |          |                                                                                              |
| Longevity effects                                    | Yes                                                            |          | Estimated transition probabilities from Taiwan's National Health Insurance Research Database |
| Health-related quality-of-life effects               | Yes                                                            |          | Health utilities from published literature                                                   |
| Other health effects                                 | No                                                             |          |                                                                                              |
| Medical costs                                        |                                                                |          |                                                                                              |
| Paid for by third-party payers                       | Yes                                                            |          | Costs from published literature                                                              |
| Paid for by patients out-of-pocket                   | Yes                                                            |          | Costs from published literature                                                              |
| Future related medical costs (payers and patients)   | Yes                                                            |          | Costs from published literature                                                              |
| Future unrelated medical costs (payers and patients) | No                                                             |          |                                                                                              |
| Informal healthcare sector                           |                                                                |          |                                                                                              |
| Health                                               |                                                                |          |                                                                                              |
| Patient-time costs                                   | Not applicable                                                 |          |                                                                                              |
| Unpaid caregiver-time costs                          | Not applicable                                                 |          |                                                                                              |
| Transportation costs                                 | Not applicable                                                 |          |                                                                                              |
| Non-healthcare sector                                |                                                                |          |                                                                                              |

|              |                |
|--------------|----------------|
| Productivity | Not applicable |
|--------------|----------------|

|             |                |
|-------------|----------------|
| Consumption | Not applicable |
|-------------|----------------|

|                 |                |
|-----------------|----------------|
| Social services | Not applicable |
|-----------------|----------------|

|                           |                |
|---------------------------|----------------|
| Legal or criminal justice | Not applicable |
|---------------------------|----------------|

|           |                |
|-----------|----------------|
| Education | Not applicable |
|-----------|----------------|

|         |                |
|---------|----------------|
| Housing | Not applicable |
|---------|----------------|

|             |                |
|-------------|----------------|
| Environment | Not applicable |
|-------------|----------------|

|       |                |
|-------|----------------|
| Other | Not applicable |
|-------|----------------|

---
